# Supplementary material for: STAT5 programs a distinct subset of GM-CSF-producing T helper cells that is essential for autoimmune neuroinflammation
Source: PubMed Central journal article supplement — Cell Res. 2014 Nov 21;24(12):1387–402. doi: 10.1038/cr.2014.154 (PMC4260352; doi:10.1038/cr.2014.154), 2014-11-21
Supplement: cr2014154x1.pdf [file cr2014154x1.pdf]

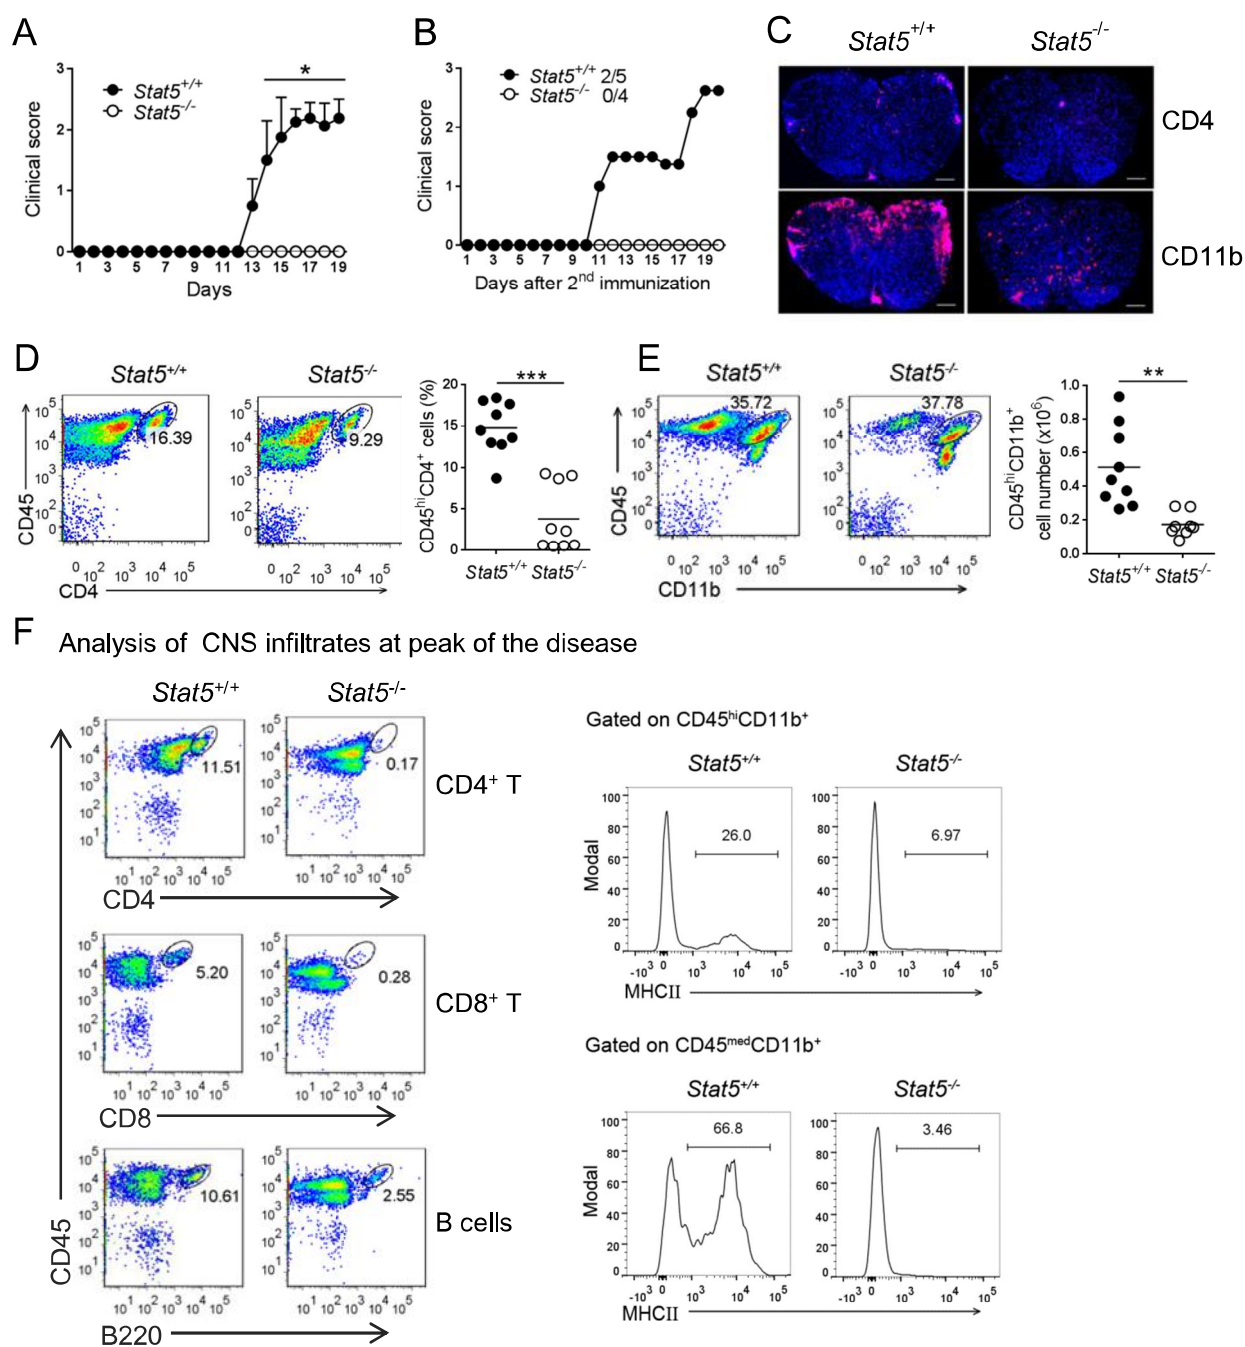

**Supplementary information, Figure S1.** Reduced neuroinflammation in T cell-specific *Stat5* knockout mice. (A and B) Clinical scores of EAE mice immunized once with MOG<sub>35-55</sub>/CFA (A, n=5 per group) or immunized twice with MOG<sub>35-55</sub>/LPS (B). (C) CD4<sup>+</sup> and CD11b<sup>+</sup> cells in spinal cord sections were stained by immunofluorescence. Images shown are representative of two independent experiments with three mice per group. Scale bars, 200  $\mu$ m. (D and E) CNS mononuclear cells were analyzed by flow cytometry at peak of disease. Right panels are cell proportions (D) or cell numbers (E) pooled from two experiments (n=9). (F) Flow cytometry analysis of CNS infiltrates at peak of disease. Data are representative of two independent experiments. \*p<0.05, \*\*p<0.005, \*\*\*p<0.0005; ns, not significant.
