# Supplementary material for: STAT5 programs a distinct subset of GM-CSF-producing T helper cells that is essential for autoimmune neuroinflammation
Source: PubMed Central journal article supplement — Cell Res. 2014 Nov 21;24(12):1387–402. doi: 10.1038/cr.2014.154 (PMC4260352; doi:10.1038/cr.2014.154), 2014-11-21
Supplement: cr2014154x2.pdf [file cr2014154x2.pdf]

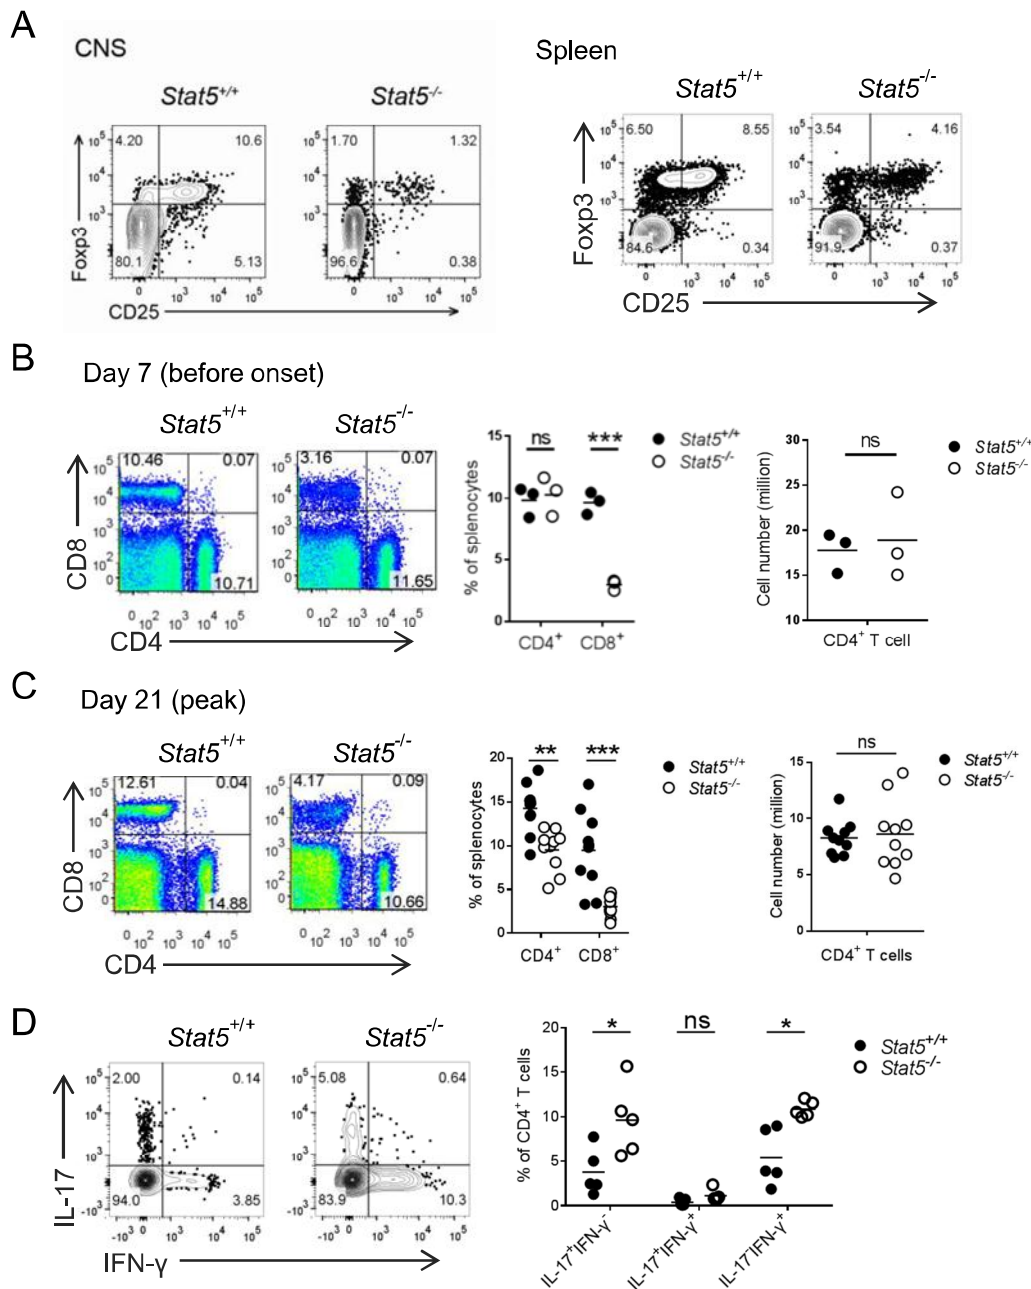

**Supplementary information, Figure S2.** Conditional *Stat5* knockout mice have no defect in CD4<sup>+</sup> T cell generation in periphery. **(A)** Flow cytometry analysis of CD25 and Foxp3 expression in CNS-infiltrating (left panel) and splenic (right panel) CD4<sup>+</sup> T cells obtained from MOG<sub>35-55</sub>/CFA-immunized mice. **(B and C)** Spleens were obtained from MOG<sub>35-55</sub>/CFA-immunized *Stat5*<sup>+/+</sup> and *Stat5*<sup>-/-</sup> mice at day 7 **(B)** and day 21 **(C)**. The proportions of CD4<sup>+</sup> and CD8<sup>+</sup> T cells were analyzed by flow cytometry. The absolute number of CD4<sup>+</sup> T cells was calculated (right panels). Data are representative of two independent experiments **(B)** or pooled from two independent experiments **(C)**. **(D)** IL-17 and IFN- $\gamma$  expression by splenic CD4<sup>+</sup> T cells of *Stat5*<sup>+/+</sup> and *Stat5*<sup>-/-</sup> EAE mice was determined by intracellular cytokine staining. Data are representative of three independent experiments. \**p*<0.5, \*\**p*<0.005, \*\*\**p*<0.0005, ns, not significant.
