# Supplementary material for: STAT5 programs a distinct subset of GM-CSF-producing T helper cells that is essential for autoimmune neuroinflammation
Source: PubMed Central journal article supplement — Cell Res. 2014 Nov 21;24(12):1387–402. doi: 10.1038/cr.2014.154 (PMC4260352; doi:10.1038/cr.2014.154), 2014-11-21
Supplement: cr2014154x3.pdf [file cr2014154x3.pdf]

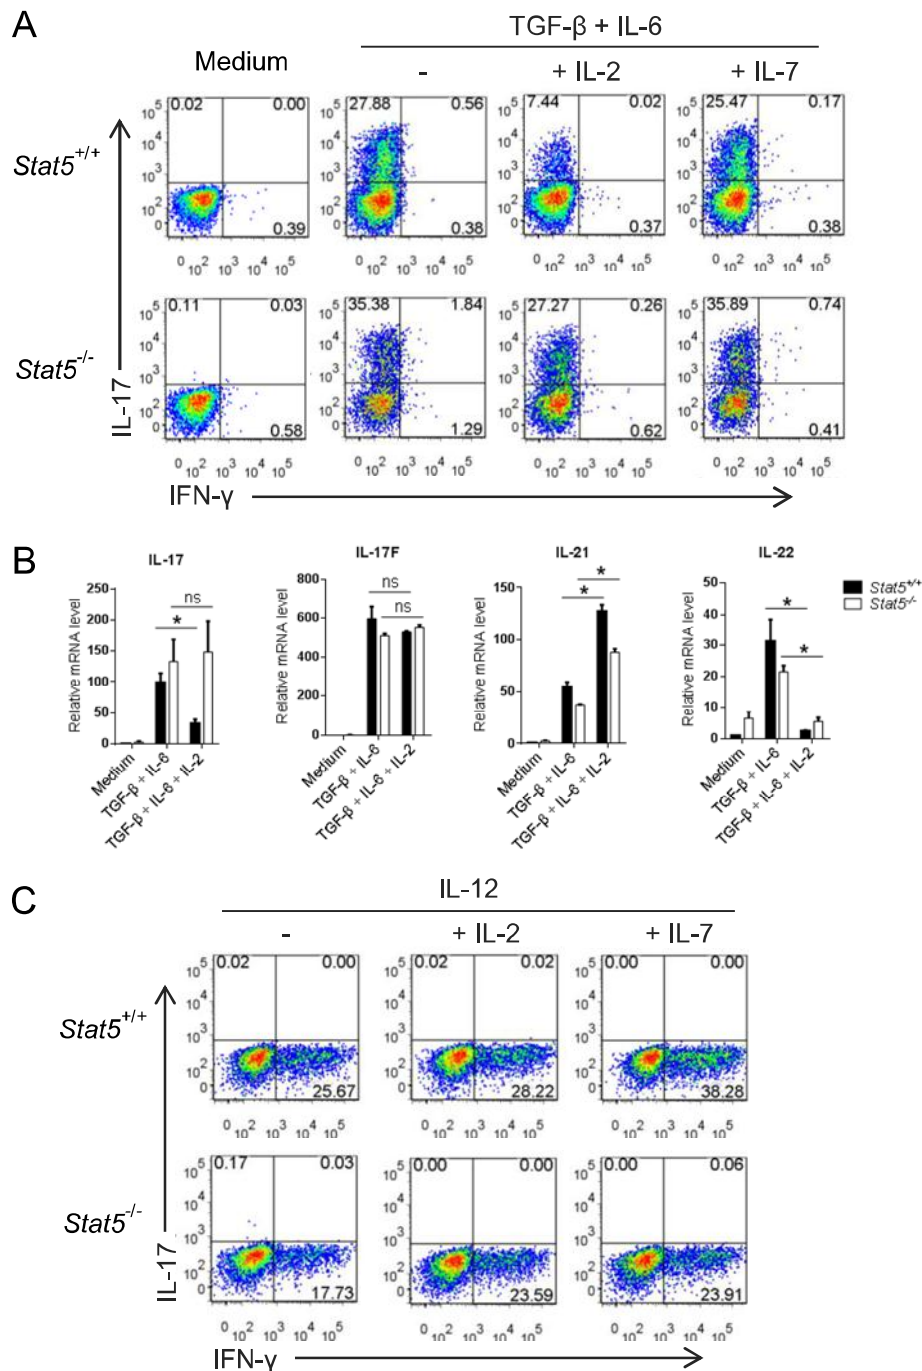

**Supplementary information, Figure S3. STAT5 in T<sub>H</sub>17 and T<sub>H</sub>1 differentiation *in vitro*.** (A) Naïve CD4<sup>+</sup> T cells were obtained from *Stat5*<sup>+/+</sup> and *Stat5*<sup>-/-</sup> mice and primed under T<sub>H</sub>17-polarizing condition in the presence of IL-2 or IL-7. IL-17 and IFN- $\gamma$  expression was measured by intracellular cytokine staining. (B) Quantitative RT-PCR analysis of IL-17, IL-17F, IL-21 and IL-22 mRNA expression by T<sub>H</sub>17 cells *in vitro*. The RT-PCR data were normalized to  $\beta$ -Actin, and expression under *Stat5*<sup>+/+</sup> medium was set to 1. (C) Naïve CD4<sup>+</sup> T cells were obtained from *Stat5*<sup>+/+</sup> and *Stat5*<sup>-/-</sup> mice and primed under T<sub>H</sub>1-polarizing condition in the presence of IL-2 or IL-7. IL-17 and IFN- $\gamma$  expression was analyzed. Data shown are representative of two independent experiments. \**p*<0.05, ns, not significant.
