# Supplementary material for: STAT5 programs a distinct subset of GM-CSF-producing T helper cells that is essential for autoimmune neuroinflammation
Source: PubMed Central journal article supplement — Cell Res. 2014 Nov 21;24(12):1387–402. doi: 10.1038/cr.2014.154 (PMC4260352; doi:10.1038/cr.2014.154), 2014-11-21
Supplement: cr2014154x4.pdf [file cr2014154x4.pdf]

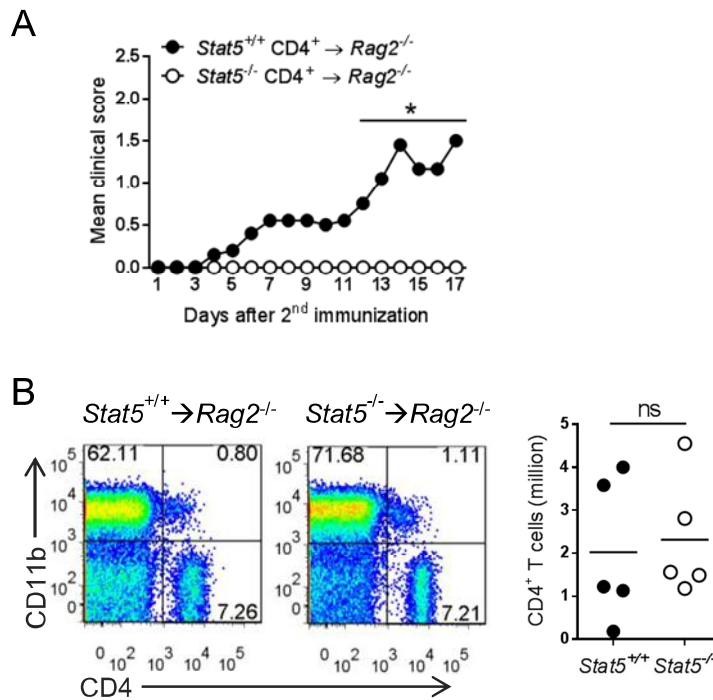

**Supplementary information, Figure S4.** *Rag2*<sup>-/-</sup> recipient mice reconstituted with *Stat5*<sup>-/-</sup> CD4<sup>+</sup> T cells are resistant to EAE. **(A)** *Rag2*<sup>-/-</sup> mice (n=5 per group) were reconstituted with CD4<sup>+</sup> T cells derived from *Stat5*<sup>+/+</sup> and *Stat5*<sup>-/-</sup> mice, followed by twice MOG<sub>35-55</sub>/CFA-immunization. Clinical scores were shown versus days. Data are representative of two independent experiments. **(B)** Spleens were obtained from *Rag2*<sup>-/-</sup> recipient mice as in **A**. The proportions of CD4<sup>+</sup> and CD11b<sup>+</sup> cells were analyzed by flow cytometry (left). The absolute number of CD4<sup>+</sup> T cells was calculated (right). \*p<0.05, ns, not significant.
