# Supplementary material for: STAT5 programs a distinct subset of GM-CSF-producing T helper cells that is essential for autoimmune neuroinflammation
Source: PubMed Central journal article supplement — Cell Res. 2014 Nov 21;24(12):1387–402. doi: 10.1038/cr.2014.154 (PMC4260352; doi:10.1038/cr.2014.154), 2014-11-21
Supplement: cr2014154x5.pdf [file cr2014154x5.pdf]

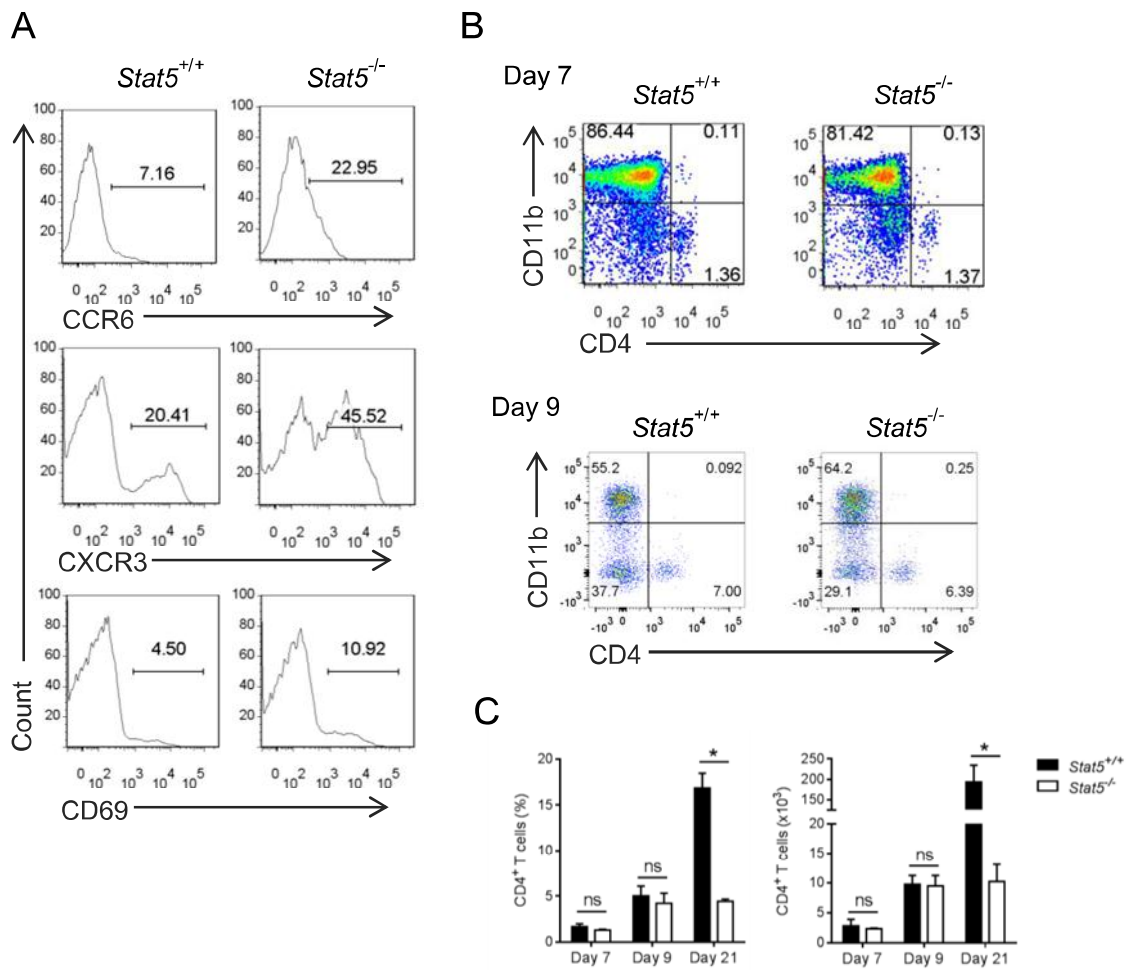

**Supplementary information, Figure S5.** *Stat5*<sup>-/-</sup> CD4<sup>+</sup> T cells can infiltrate CNS. **(A)** CCR6, CXCR3 and CD69 expression by splenic CD4<sup>+</sup> T cells of *Stat5*<sup>+/+</sup> and *Stat5*<sup>-/-</sup> EAE mice was measured. Data are representative of two independent experiments with three to five mice per group. **(B and C)** CNS-infiltrating CD4<sup>+</sup> T cells were analyzed at day 7, 9 and 21 after first MOG<sub>35-55</sub>/CFA immunization. Cell numbers were calculated (**C**, right panel). Data are representative of two independent experiments with three mice per group. \**p*<0.5, ns, not significant.
