# Supplementary material for: STAT5 programs a distinct subset of GM-CSF-producing T helper cells that is essential for autoimmune neuroinflammation
Source: PubMed Central journal article supplement — Cell Res. 2014 Nov 21;24(12):1387–402. doi: 10.1038/cr.2014.154 (PMC4260352; doi:10.1038/cr.2014.154), 2014-11-21
Supplement: cr2014154x6.pdf [file cr2014154x6.pdf]

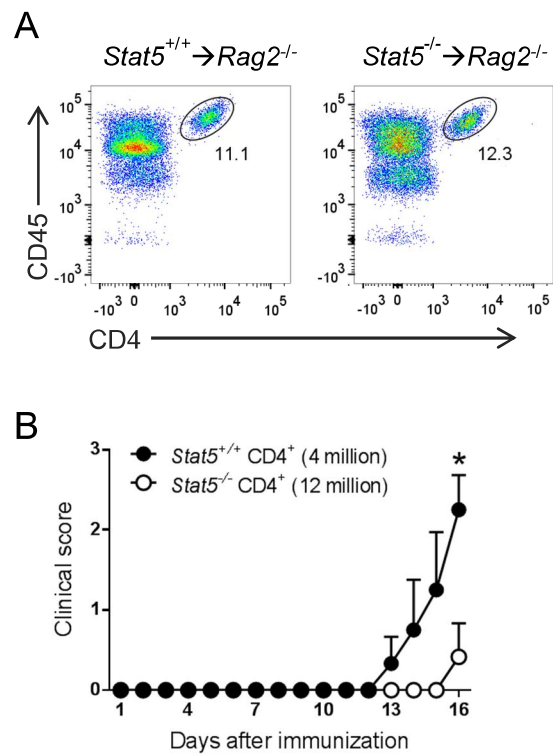

**Supplementary information, Figure S6.** Enhanced infiltration of STAT5-deficient CD4<sup>+</sup> T cells in the CNS still have inability to induce EAE. (**A** and **B**) CD4<sup>+</sup> T cell infiltration (**A**) and clinical scores (**B**) of *Rag2<sup>-/-</sup>* recipient mice transferred with different numbers of *Stat5<sup>+/+</sup>* and *Stat5<sup>-/-</sup>* CD4<sup>+</sup> T cells followed with MOG<sub>35-55</sub>/CFA immunization. \**p*<0.05.
