# Supplementary material for: STAT5 programs a distinct subset of GM-CSF-producing T helper cells that is essential for autoimmune neuroinflammation
Source: PubMed Central journal article supplement — Cell Res. 2014 Nov 21;24(12):1387–402. doi: 10.1038/cr.2014.154 (PMC4260352; doi:10.1038/cr.2014.154), 2014-11-21
Supplement: cr2014154x7.pdf [file cr2014154x7.pdf]

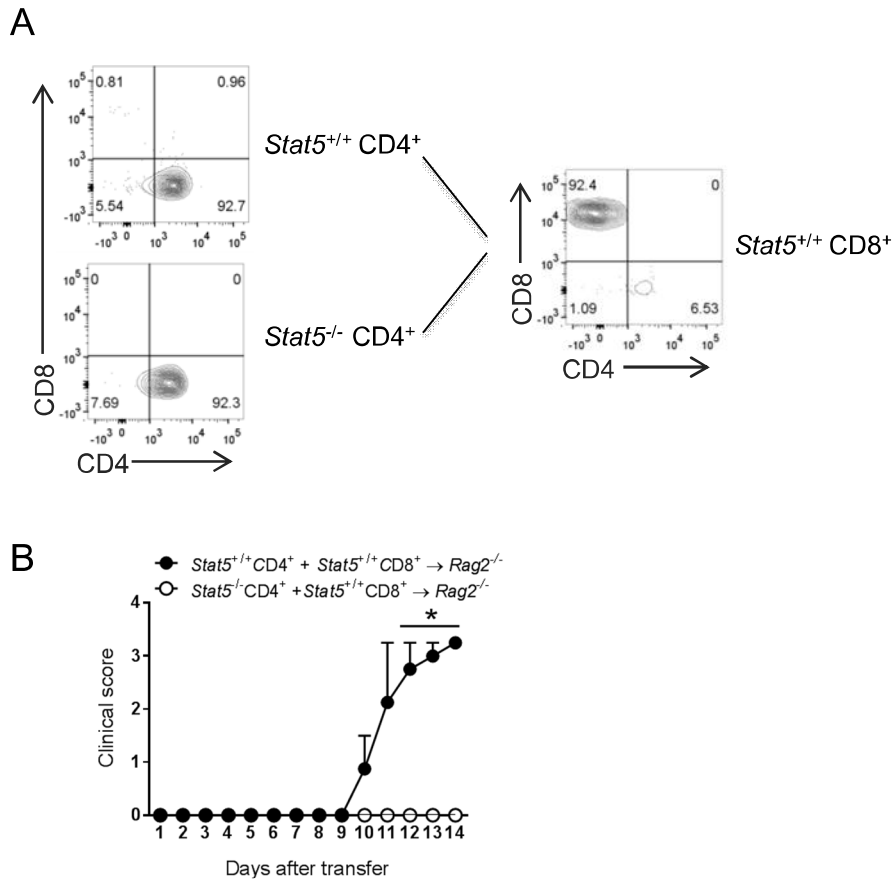

**Supplementary information, Figure S7.** *Stat5*<sup>+/+</sup> CD8<sup>+</sup> T cells fail to rescue the impaired encephalitogenicity of *Stat5*<sup>-/-</sup> CD4<sup>+</sup> T cells. LNs and splenocytes were obtained from MOG<sub>35-55</sub>/CFA-immunized *Stat5*<sup>+/+</sup> and *Stat5*<sup>-/-</sup> mice at day 10-14 and cultured with MOG<sub>35-55</sub> (20 μg/ml) in the presence of IL-23 and IL-1β for 3 days. CD4<sup>+</sup> and CD8<sup>+</sup> T cells were purified by positive selection and transferred into *Rag2*<sup>-/-</sup> mice at different combination as indicated. **(A)** FACS plots showing the purity of CD4<sup>+</sup> and CD8<sup>+</sup> T cells before adoptive transfer. **(B)** Clinical scores of *Rag2*<sup>-/-</sup> recipient mice (n=3 per group) after adoptive transfer of different combination of CD4<sup>+</sup> (1 million) and CD8<sup>+</sup> T cells (1 million). \*p<0.05.
