# Supplementary material for: STAT5 programs a distinct subset of GM-CSF-producing T helper cells that is essential for autoimmune neuroinflammation
Source: PubMed Central journal article supplement — Cell Res. 2014 Nov 21;24(12):1387–402. doi: 10.1038/cr.2014.154 (PMC4260352; doi:10.1038/cr.2014.154), 2014-11-21
Supplement: cr2014154x8.pdf [file cr2014154x8.pdf]

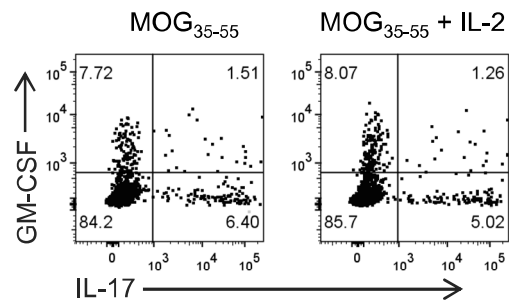

**Supplementary information, Figure S8.** IL-2 does not have a major effect on the frequency of GM-CSF<sup>+</sup> CD4<sup>+</sup> cells. Splenocytes were obtained from MOG<sub>35-55</sub>/CFA-immunized WT mice before disease onset and challenged with MOG<sub>35-55</sub> (20 µg/ml) in the absence or presence of IL-2 for 48 h. The frequencies of GM-CSF<sup>+</sup> and IL-17<sup>+</sup> cells among CD4<sup>+</sup>CD44<sup>hi</sup> T cells were measured by flow cytometry.
