# Supplementary material for: STAT5 programs a distinct subset of GM-CSF-producing T helper cells that is essential for autoimmune neuroinflammation
Source: PubMed Central journal article supplement — Cell Res. 2014 Nov 21;24(12):1387–402. doi: 10.1038/cr.2014.154 (PMC4260352; doi:10.1038/cr.2014.154), 2014-11-21
Supplement: cr2014154x9.pdf [file cr2014154x9.pdf]

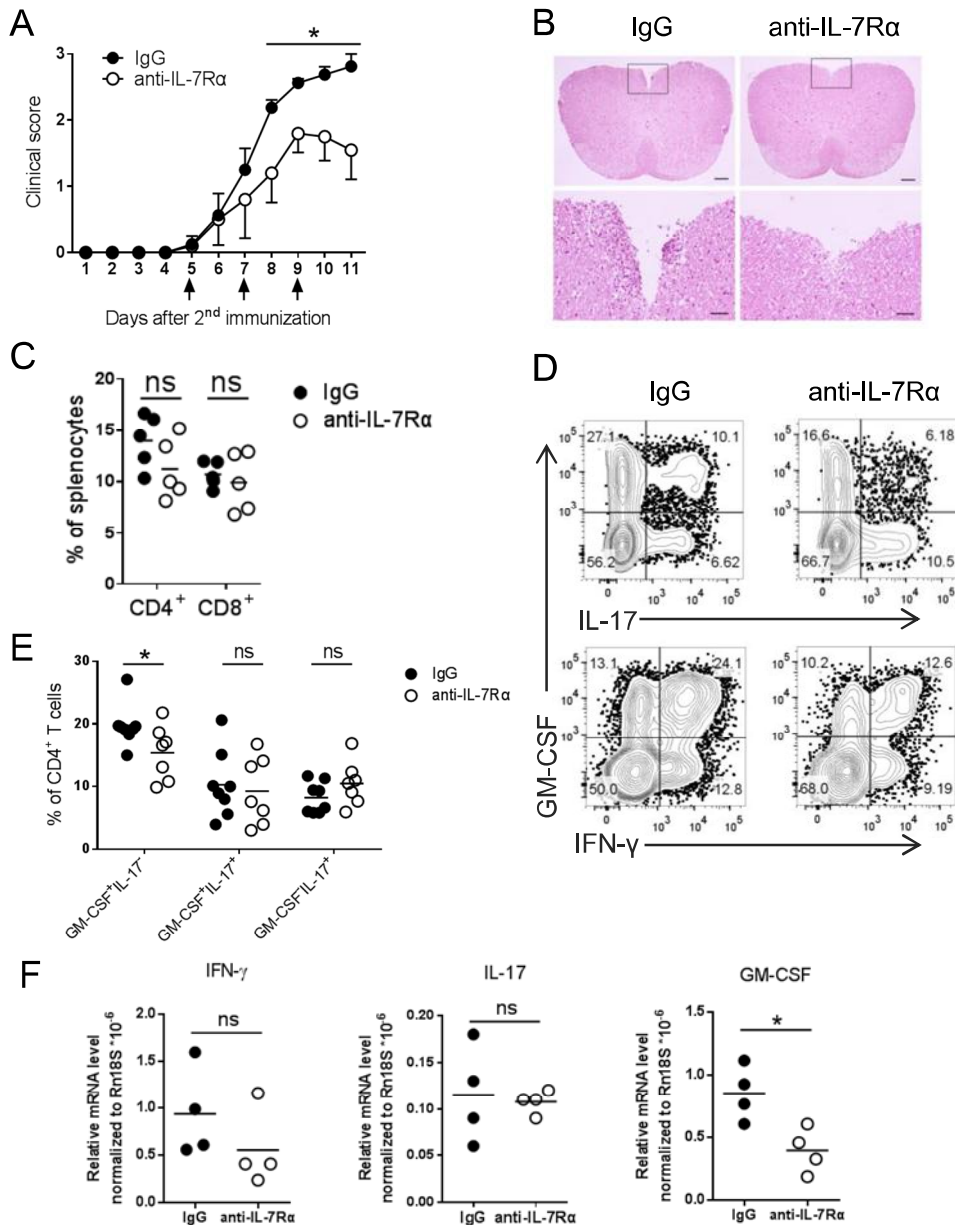

**Supplementary information, Figure S9.** IL-7R $\alpha$  neutralization attenuates GM-CSF expression and ameliorates EAE. **(A)** Clinical scores of EAE mice (n=5) treated with anti-IL-7R $\alpha$  or normal IgG given every other day from day 5 after 2<sup>nd</sup> immunization, as indicated by arrows. Data represent two independent experiments. **(B)** Spinal cord sections were obtained from EAE mice at day 11 after 2<sup>nd</sup> immunization. Immune cell infiltration was assessed histologically. Images shown are representative of three individuals per group. Scale bars, 200  $\mu$ m (top), 50  $\mu$ m (bottom). **(C)** The percentages of CD4<sup>+</sup> and CD8<sup>+</sup> T cells in spleens of EAE mice. Data represent two independent experiments. **(D and E)** The frequencies of GM-CSF<sup>+</sup>, IL-17<sup>+</sup> and IFN- $\gamma$ <sup>+</sup> cells among CD4<sup>+</sup> T cells in the CNS of EAE mice receiving different treatment at peak of disease. Data in **E** were pooled from two independent experiments. **(F)** CNS tissues were collected from EAE mice for RNA extraction at peak of disease. The mRNA expression of IFN- $\gamma$ , IL-17 and GM-CSF in the CNS was measured by RT-PCR. \* $p$ <0.05, ns, not significant.
