# Supplementary material for: STAT5 programs a distinct subset of GM-CSF-producing T helper cells that is essential for autoimmune neuroinflammation
Source: PubMed Central journal article supplement — Cell Res. 2014 Nov 21;24(12):1387–402. doi: 10.1038/cr.2014.154 (PMC4260352; doi:10.1038/cr.2014.154), 2014-11-21
Supplement: cr2014154x10.pdf [file cr2014154x10.pdf]

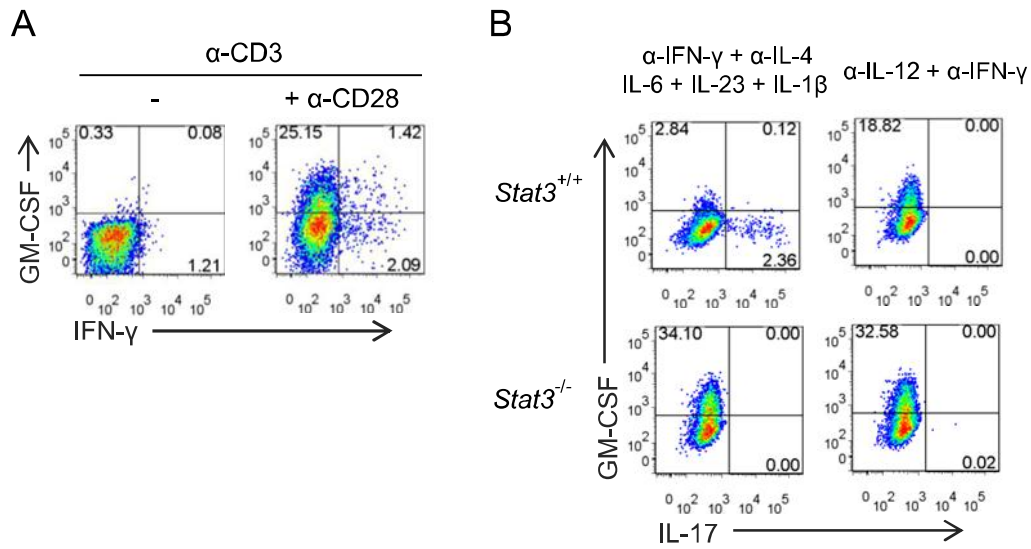

**Supplementary information, Figure S10.** STAT3 negatively regulates GM-CSF expression. **(A)** GM-CSF and IFN- $\gamma$  expression in naive CD4<sup>+</sup> T cells activated for 72 h with anti-CD3 alone or plus anti-CD28. **(B)** Naive CD4<sup>+</sup> T cells from *Stat3*<sup>+/+</sup> and *Stat3*<sup>-/-</sup> mice were polarized under conditions as indicated for 72 h. The frequencies of GM-CSF<sup>+</sup> and IL-17<sup>+</sup> cells were analyzed.
