# Supplementary material for: STAT5 programs a distinct subset of GM-CSF-producing T helper cells that is essential for autoimmune neuroinflammation
Source: PubMed Central journal article supplement — Cell Res. 2014 Nov 21;24(12):1387–402. doi: 10.1038/cr.2014.154 (PMC4260352; doi:10.1038/cr.2014.154), 2014-11-21
Supplement: cr2014154x11.pdf [file cr2014154x11.pdf]

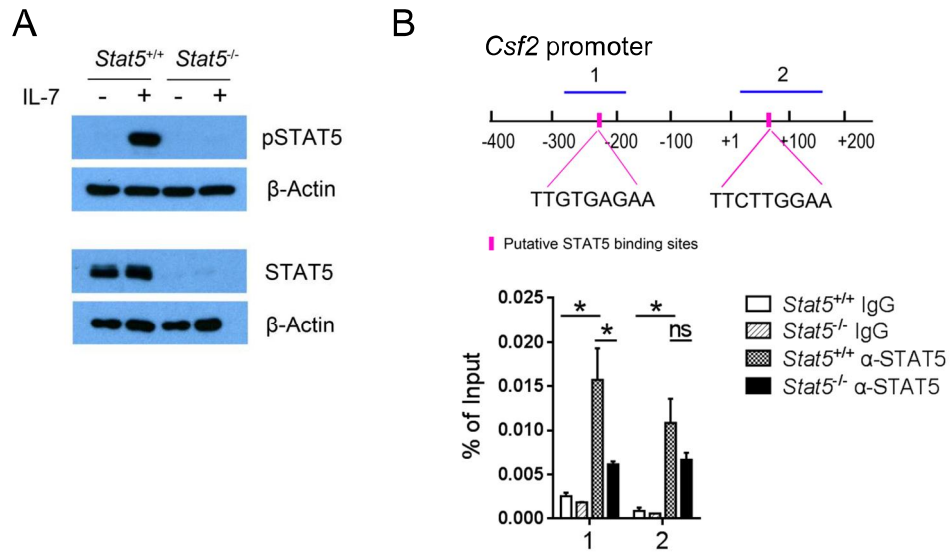

**Supplementary information, Figure S11.** STAT5 activated by IL-7 directly binds *Csf2* promoter. **(A)** Immunoblotting of pSTAT5 and STAT5 in IL-7-stimulated CD4<sup>+</sup> T cells isolated from *Stat5<sup>-/-</sup>* or control mice. **(B)** The ChIP assay was performed with *Stat5<sup>+/+</sup>* and *Stat5<sup>-/-</sup>* CD4<sup>+</sup> T cells using normal IgG or STAT5-specific antibody. The binding of antibodies to *Csf2* promoter region was detected by RT-PCR. \* $p < 0.05$ , ns, not significant.
