# Supplementary material for: STAT5 programs a distinct subset of GM-CSF-producing T helper cells that is essential for autoimmune neuroinflammation
Source: PubMed Central journal article supplement — Cell Res. 2014 Nov 21;24(12):1387–402. doi: 10.1038/cr.2014.154 (PMC4260352; doi:10.1038/cr.2014.154), 2014-11-21
Supplement: cr2014154x12.pdf [file cr2014154x12.pdf]

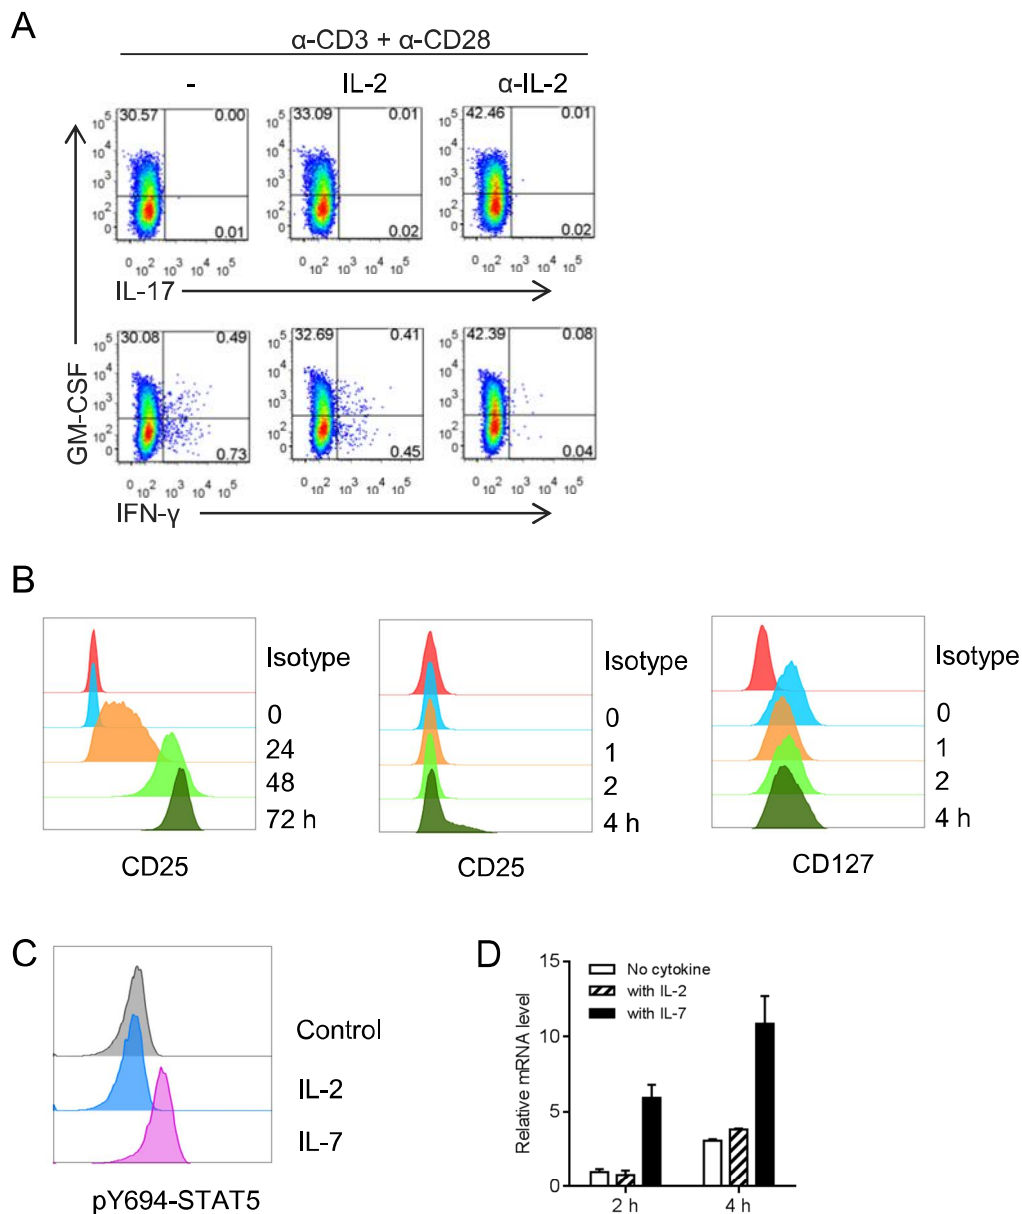

**Supplementary information, Figure S12.** IL-2 does not promote GM-CSF-producing  $T_H$  differentiation from naive  $CD4^+$  T cells. **(A)** Naive  $CD4^+$  T cells were activated with anti-CD3 and anti-CD28 in the presence of IL-2 or anti-IL-2. The frequencies of GM-CSF<sup>+</sup>, IL-17<sup>+</sup> and IFN- $\gamma$ <sup>+</sup> cells were analyzed. **(B)** Flow cytometry of CD25 and CD127 on the surface of naive  $CD4^+$  T cells or cells activated with anti-CD3 and anti-CD28 at various time points as indicated. **(C)** Activation of STAT5 in naive  $CD4^+$  T cells stimulated with IL-2 or IL-7 for 30 min. **(D)** The mRNA expression of GM-CSF in naive  $CD4^+$  T cells stimulated with anti-CD3 and anti-CD28 in the presence of IL-2 or IL-7. The RT-PCR data were normalized to  $\beta$ -Actin, and expression in naive T cells activated for 2 h without cytokine was set to 1.
