# Supplementary material for: STAT5 programs a distinct subset of GM-CSF-producing T helper cells that is essential for autoimmune neuroinflammation
Source: PubMed Central journal article supplement — Cell Res. 2014 Nov 21;24(12):1387–402. doi: 10.1038/cr.2014.154 (PMC4260352; doi:10.1038/cr.2014.154), 2014-11-21
Supplement: cr2014154x13.pdf [file cr2014154x13.pdf]

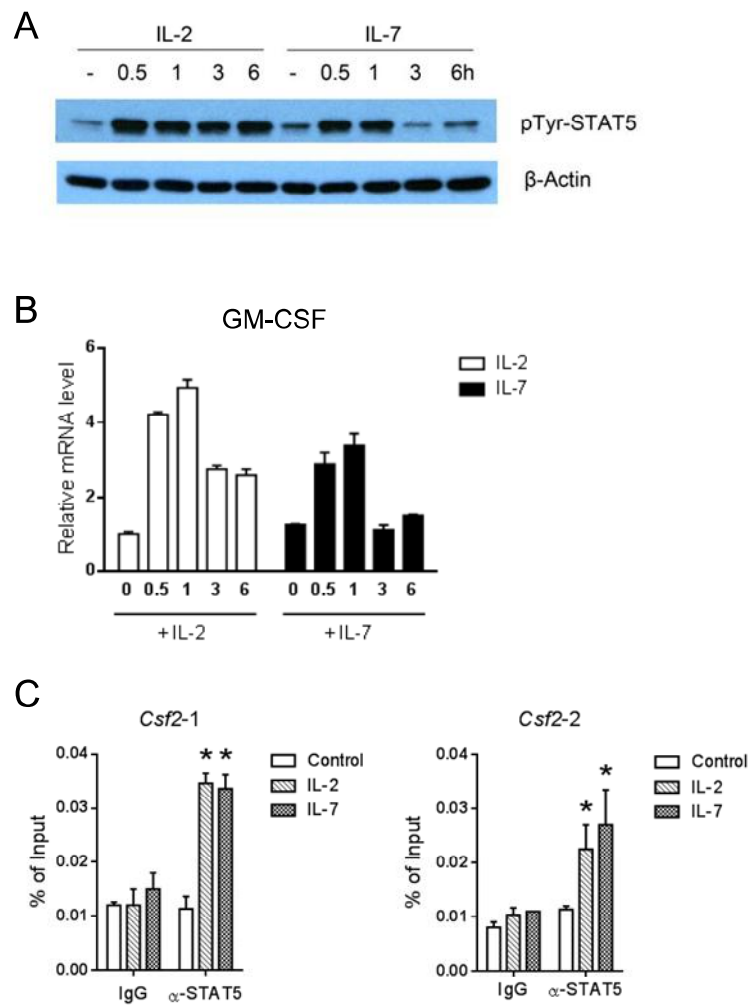

**Supplementary information, Figure S13.** Both IL-2 and IL-7 can induce STAT5 activation and GM-CSF expression in activated CD4<sup>+</sup> T cells. **(A and B)** CD4<sup>+</sup> T cells were activated with anti-CD3 and anti-CD28 for 3 days. After resting in fresh medium, cells were stimulated with IL-2 or IL-7 at various time points. The pTyr-STAT5 and β-Actin were detected by immunoblotting **(A)**. GM-CSF mRNA expression was measured by RT-PCR **(B)**. The RT-PCR data were normalized to β-Actin, and expression in cells without cytokine stimulation was set to 1. **(C)** The ChIP assay was performed with normal IgG or STAT5-specific antibody. The binding of antibodies to *Csf2* promoter region was detected by RT-PCR
